# Supplementary material for: Magnetic beads-based electrochemiluminescence immunosensor for determination of cancer markers using quantum dot functionalized PtRu alloys as labels
Source: Royal Society of Chemistry journal article supplement (doi:10.1039/c2an16170b), 2012-01-01
Supplement: c2an16170b.pdf [file c2an16170b.pdf]

# Supplemental Information

## **Magnetic beads-based electrochemiluminescence immunosensor for determination of cancer markers using quantum dots functionalized PtRu alloy as labels**

Yan Zhang,<sup>a</sup> Shenguang Ge,<sup>a,b</sup> Shaowei Wang,<sup>a</sup> Mei Yan,<sup>a</sup> Jinghua Yu,<sup>a\*</sup> Xianrang  
Song,<sup>c\*</sup> Weiyan Liu<sup>a</sup>

<sup>a</sup> *Key Laboratory of Chemical Sensing & Analysis in Universities of Shandong  
(University of Jinan), School of Chemistry and Chemical Engineering, University of  
Jinan, Jinan 250022, China*

<sup>b</sup> *Shandong Provincial Key Laboratory of Fluorine Chemistry and Chemical  
Materials, University of Jinan, Jinan 250022, P.R. China*

<sup>c</sup> *Cancer Research Center, Shandong Tumor Hospital, Jinan 250012, P.R. China*

\*Corresponding authors: Jinghua Yu, Xianrang Song

E-mail: [ujn.yujh@gmail.com](mailto:ujn.yujh@gmail.com) (J. Yu); [sxr@vip.163.com](mailto:sxr@vip.163.com) (X. Song);

Telephone: +86-531-82767161

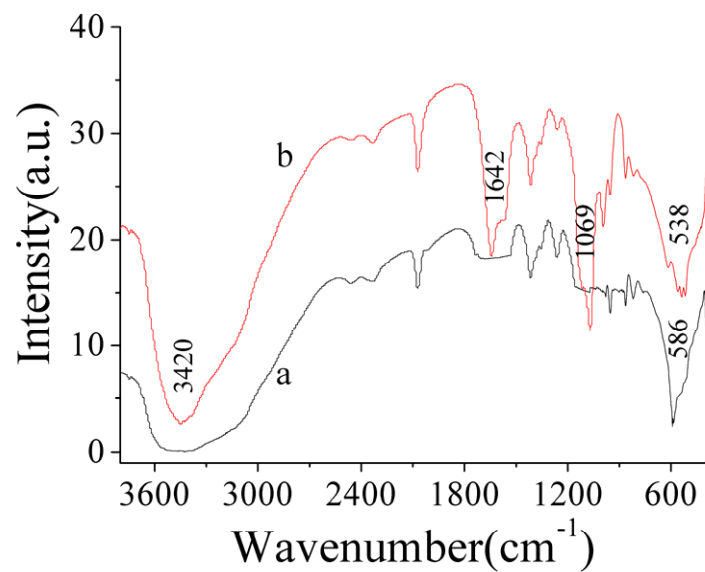

Fig. S1 FT-IR spectra of  $\text{Fe}_3\text{O}_4$  (a) and  $\text{Fe}_3\text{O}_4/\text{CS}$  (b)

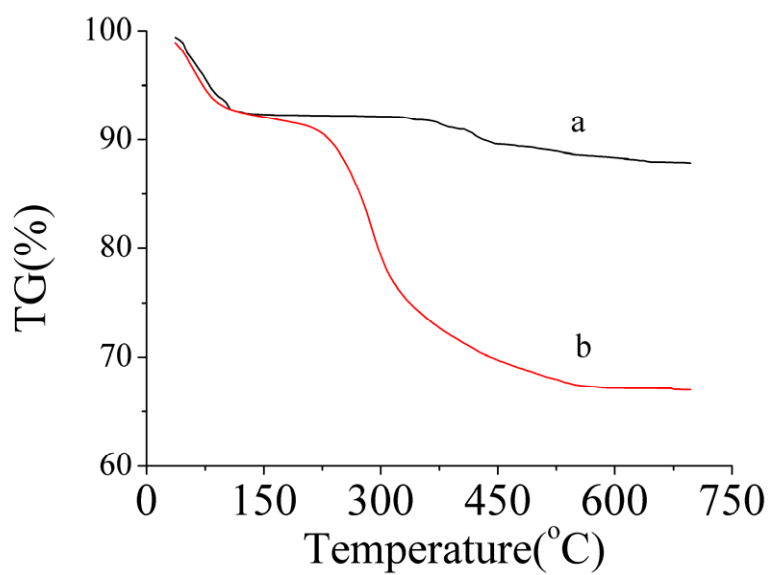

Fig. S2 TG curve of  $\text{Fe}_3\text{O}_4$  (a) and  $\text{Fe}_3\text{O}_4/\text{CS}$  (b) MNPs

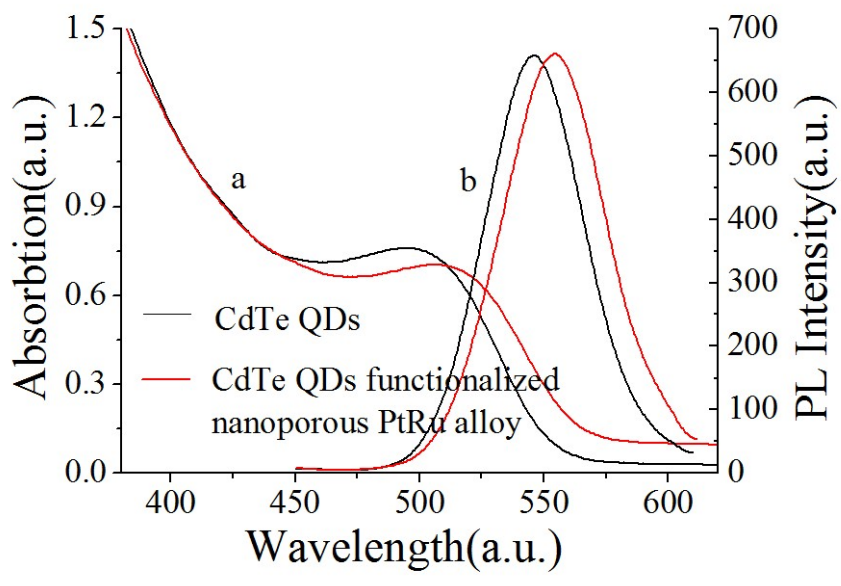

Fig. S3 Absorption (a) and PL (b) spectra of the CdTe QDs and QDs@PtRu
